# Supplementary material for: Dinuclear platinum complexes containing aryl-isoquinoline and oxadiazole-thiol with an efficiency of over 8.8%: in-depth investigation of the relationship between their molecular structure and near-infrared electroluminescent properties in PLEDs
Source: Royal Society of Chemistry journal article supplement (doi:10.1039/c6tc00825a), 2016-01-01
Supplement: c6tc00825a1.pdf [file c6tc00825a1.pdf]

## Supporting Information

### **Di-nuclear platinum complexes containing aryl-isoquinoline and oxadiazole-thiol with an efficiency over 8.8%: In-depth investigation on relationship between the molecular structure and near-infrared electroluminescent properties in PLEDs**

*Wenjing Xiong,<sup>a</sup> Fanyuan Meng,<sup>a,c</sup> Hua Tan,<sup>a\*</sup> Pu Wang,<sup>a</sup> Youming Zhang,<sup>a</sup> Qiang Tao,<sup>a</sup> Yu Liu,<sup>a</sup> Shijian Su,<sup>c\*</sup> Weiguo Zhu,<sup>a, b\*</sup>*

#### Contents

**Figure S1.** Representative frontier orbitals for  $(\text{piq})_2\text{Pt}_2(\mu\text{-PhOXT})_2$ .

**Figure S2.** Representative frontier orbitals for  $(\text{piq})_2\text{Pt}_2(\mu\text{-C}_8\text{OXT})_2$ .

**Figure S3.** Representative frontier orbitals for  $(2\text{niq})_2\text{Pt}_2(\mu\text{-C}_8\text{OXT})_2$ .

**Figure S4.** PL spectra of the dinuclear platinum complexes in DCM ( $10^{-5}$  M) at 77 K.

**Figure S5.** Optimal structure of  $(\text{piq})_2\text{Pt}_2(\mu\text{-PhOXT})_2$  (a),  $(\text{piq})_2\text{Pt}_2(\mu\text{-C}_8\text{PhOXT})_2$  (b) and  $(2\text{niq})_2\text{Pt}_2(\mu\text{-C}_8\text{PhOXT})_2$  (c). Selected dihedral angles: (a) N11-C36-C35-C26:  $10.28^\circ$ , N12-C60-C61-C51:  $11.52^\circ$ ; (b) N2-C3-C11-C12:  $10.33^\circ$ , N44-C45-C53-C54:  $13.28^\circ$ ; (c) N2-C3-C11-C12:  $20.12^\circ$ , N44-C45-C53-C54:  $20.41^\circ$ .

**Figure S6.** EL spectra of the  $(\text{piq})_2\text{Pt}_2(\mu\text{-PhOXT})_2$ -,  $(\text{piq})_2\text{Pt}_2(\mu\text{-C}_8\text{PhOXT})_2$ - and  $(2\text{niq})_2\text{Pt}_2(\mu\text{-C}_8\text{PhOXT})_2$ -doped devices at different dopant concentrations from 6 wt% and 9 wt% to 12 wt%.

**Figure S7.** The  $J$ - $V$ - $R$  curves of the  $(\text{piq})_2\text{Pt}_2(\mu\text{-PhOXT})_2$ -,  $(\text{piq})_2\text{Pt}_2(\mu\text{-C}_8\text{PhOXT})_2$ - and  $(2\text{niq})_2\text{Pt}_2(\mu\text{-C}_8\text{PhOXT})_2$ -doped devices at different dopant concentrations from 6 wt% and 9 wt% to 12 wt%.

**Figure S8.**  $EQE$ - $J$  curves of the  $(\text{piq})_2\text{Pt}_2(\mu\text{-PhOXT})_2$ -,  $(\text{piq})_2\text{Pt}_2(\mu\text{-C}_8\text{PhOXT})_2$ - and  $(2\text{niq})_2\text{Pt}_2(\mu\text{-C}_8\text{PhOXT})_2$ -doped devices at different dopant concentrations from 6 wt% and 9 wt% to 12 wt%.

**Figure S9.**  $^1\text{H}$  NMR of  $(\text{piq})_2\text{Pt}_2(\mu\text{-PhOXT})_2$  (a),  $(\text{piq})_2\text{Pt}_2(\mu\text{-C}_8\text{PhOXT})_2$  (b) and  $(2\text{niq})_2\text{Pt}_2(\mu\text{-C}_8\text{PhOXT})_2$  (c).

**Figure S10.**  $^{13}\text{C}$  NMR of  $(\text{piq})_2\text{Pt}_2(\mu\text{-PhOXT})_2$  (a),  $(\text{piq})_2\text{Pt}_2(\mu\text{-C}_8\text{PhOXT})_2$  (b) and

(2niq)<sub>2</sub>Pt<sub>2</sub>(μ-C<sub>8</sub>PhOXT)<sub>2</sub> (c).

**Figure S11.** MALDI-TOF MS plots of (piq)<sub>2</sub>Pt<sub>2</sub>(μ-PhOXT)<sub>2</sub> (a), (piq)<sub>2</sub>Pt<sub>2</sub>(μ-C<sub>8</sub>PhOXT)<sub>2</sub> (b) and (2niq)<sub>2</sub>Pt<sub>2</sub>(μ-C<sub>8</sub>PhOXT)<sub>2</sub> (c)

**Table S1.** Calculated excitation energy (E), oscillator strength (f), dominant contributing transitions and associated percent contribution and assignment of complexes (piq)<sub>2</sub>Pt<sub>2</sub>(μ-PhOXT)<sub>2</sub>, (piq)<sub>2</sub>Pt<sub>2</sub>(μ-C<sub>8</sub>OXT)<sub>2</sub> and (2niq)<sub>2</sub>Pt<sub>2</sub>(μ-C<sub>8</sub>OXT)<sub>2</sub> (c).

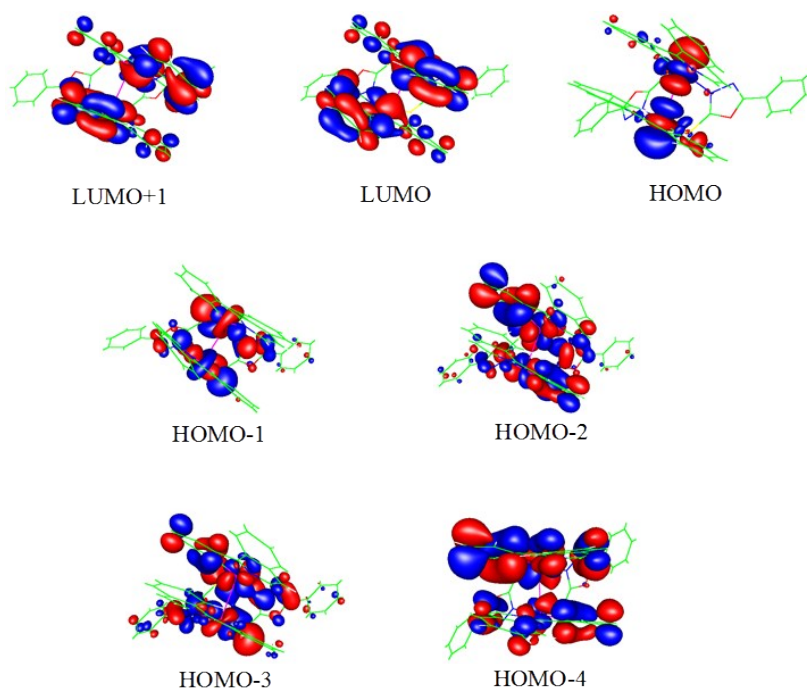

**Figure S1.** Representative frontier orbitals for (piq)<sub>2</sub>Pt<sub>2</sub>(μ-PhOXT)<sub>2</sub>.

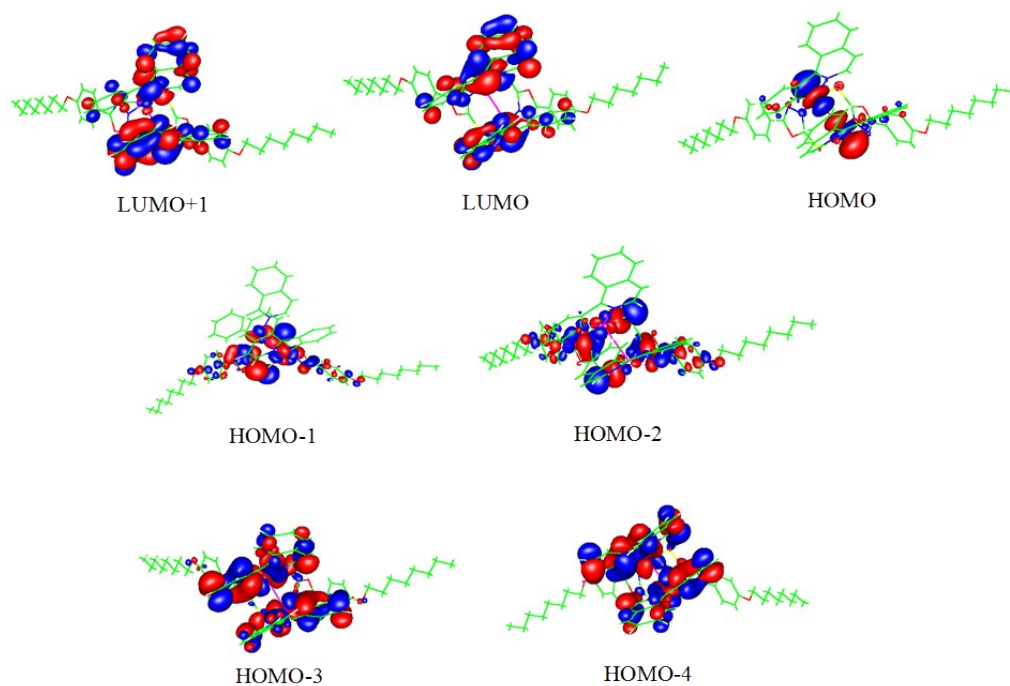

**Figure S2.** Representative frontier orbitals for  $(\text{piq})_2\text{Pt}_2(\mu\text{-C}_8\text{OXT})_2$ .

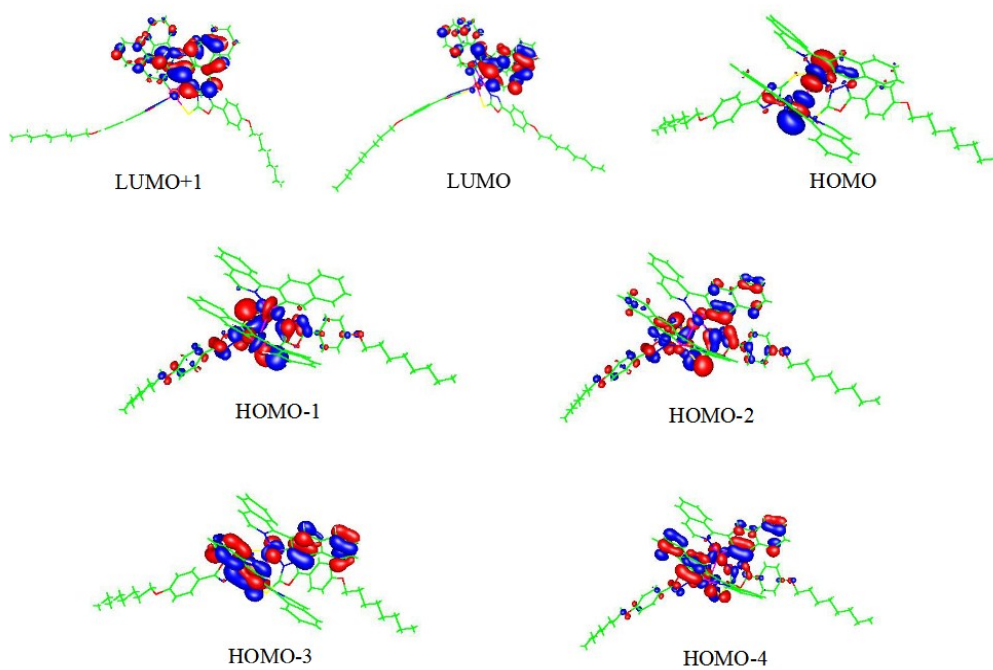

**Figure S3.** Representative frontier orbitals for  $(2\text{niq})_2\text{Pt}_2(\mu\text{-C}_8\text{OXT})_2$ .

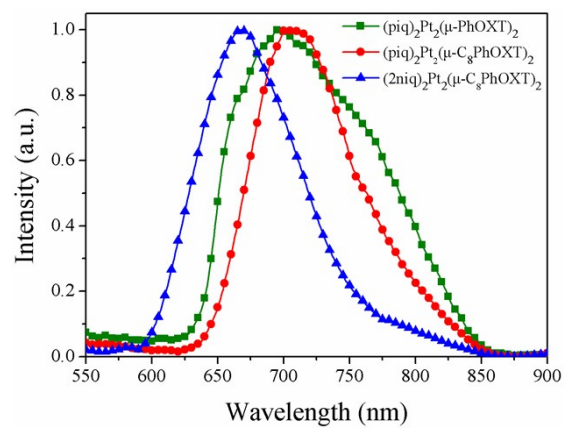

**Figure S4.** PL spectra of the dinuclear platinum complexes in DCM ( $10^{-5}$  M) at 77 K.

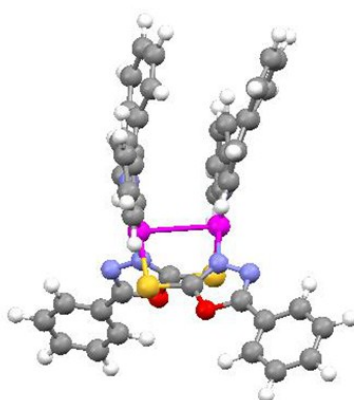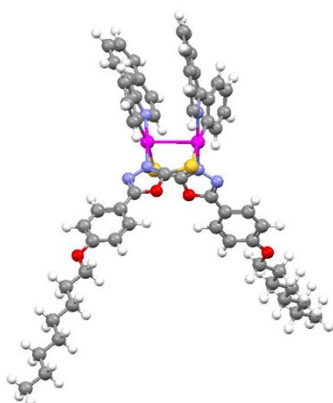

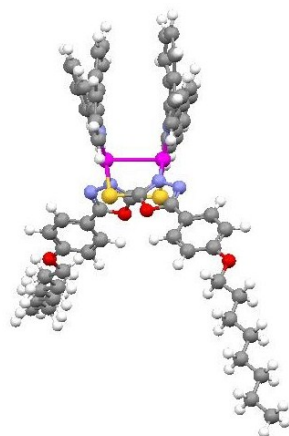

(c)

**Figure S5.** Optimal structure of  $(\text{piq})_2\text{Pt}_2(\mu\text{-PhOXT})_2$  (a),  $(\text{piq})_2\text{Pt}_2(\mu\text{-C}_8\text{PhOXT})_2$  (b) and  $(2\text{niq})_2\text{Pt}_2(\mu\text{-C}_8\text{PhOXT})_2$  (c). Selected dihedral angles: (a) N11-C36-C35-C26:  $10.28^\circ$ , N12-C60-C61-C51:  $11.52^\circ$ ; (b) N2-C3-C11-C12:  $10.33^\circ$ , N44-C45-C53-C54:  $13.28^\circ$ ; (c) N2-C3-C11-C12:  $20.12^\circ$ , N44-C45-C53-C54:  $20.41^\circ$ .

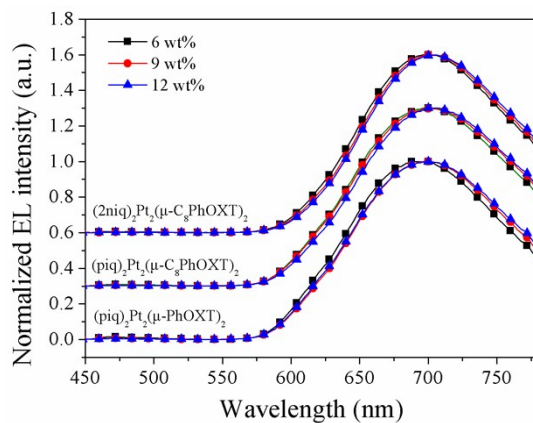

**Figure S6.** EL spectra of the  $(\text{piq})_2\text{Pt}_2(\mu\text{-PhOXT})_2$ -,  $(\text{piq})_2\text{Pt}_2(\mu\text{-C}_8\text{PhOXT})_2$ - and  $(2\text{niq})_2\text{Pt}_2(\mu\text{-C}_8\text{PhOXT})_2$ -doped devices at different dopant concentrations from 6 wt% and 9 wt% to 12 wt%.

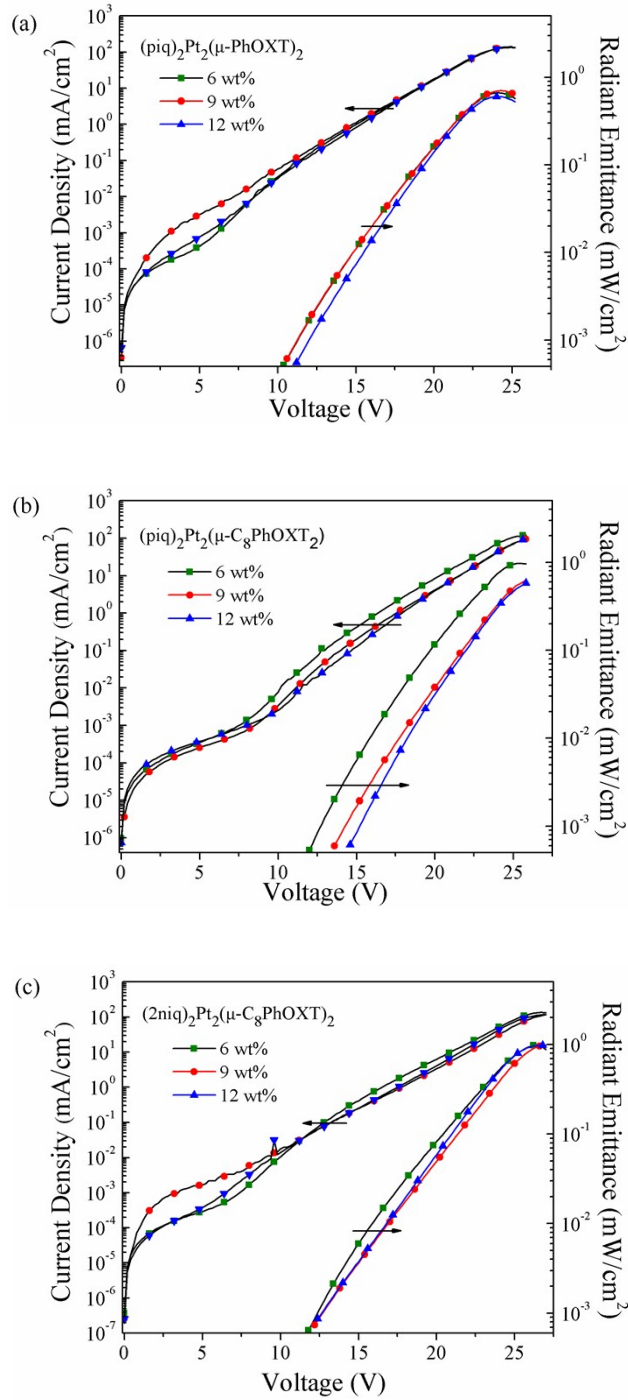

**Figure S7.** The  $J$ - $V$ - $R$  curves of the the  $(\text{piq})_2\text{Pt}_2(\mu\text{-PhOXT})_2$ -,  $(\text{piq})_2\text{Pt}_2(\mu\text{-C}_8\text{PhOXT})_2$ - and  $(2\text{niq})_2\text{Pt}_2(\mu\text{-C}_8\text{PhOXT})_2$ -doped devices at different dopant concentration -s from 6 wt% and 9 wt% to 12 wt%.

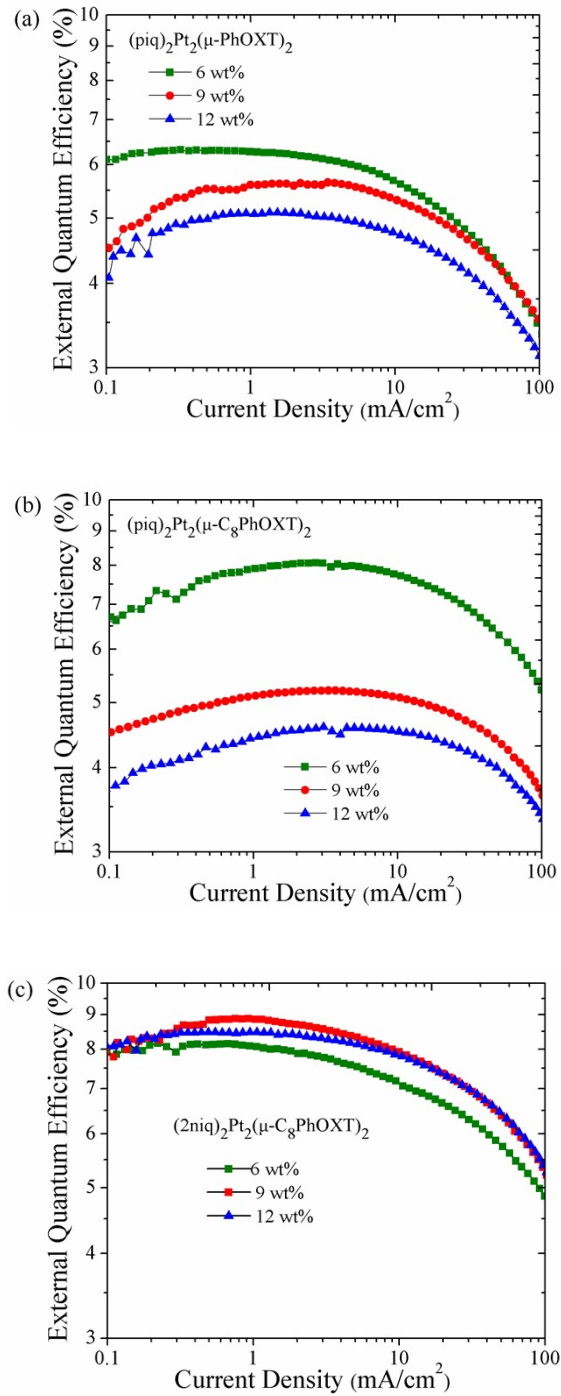

**Figure S8.** EQE-J curves of the  $(\text{piq})_2\text{Pt}_2(\mu\text{-PhOXT})_2$ -,  $(\text{piq})_2\text{Pt}_2(\mu\text{-C}_8\text{PhOXT})_2$ - and  $(2\text{niq})_2\text{Pt}_2(\mu\text{-C}_8\text{PhOXT})_2$ -doped devices at different dopant concentrations from 6 wt% and 9 wt% to 12 wt%.

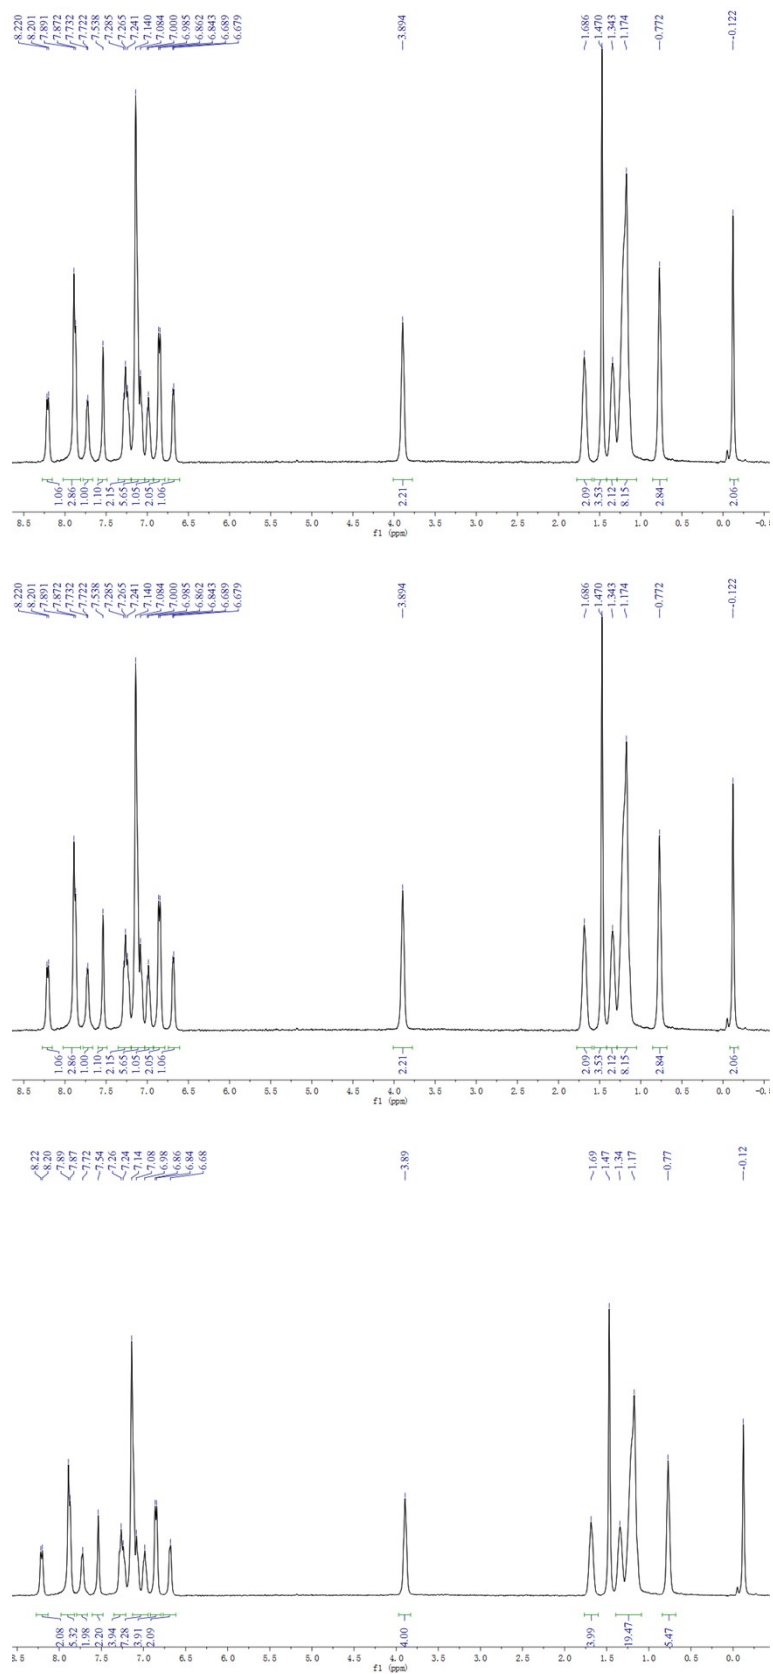

**Figure S9.** <sup>1</sup>H NMR of (piq)<sub>2</sub>Pt<sub>2</sub>(μ-PhOXT)<sub>2</sub> (a) , (piq)<sub>2</sub>Pt<sub>2</sub>(μ-C<sub>8</sub>PhOXT)<sub>2</sub> (b) and (2niq)<sub>2</sub>Pt<sub>2</sub>(μ-C<sub>8</sub>PhOXT)<sub>2</sub> (c).



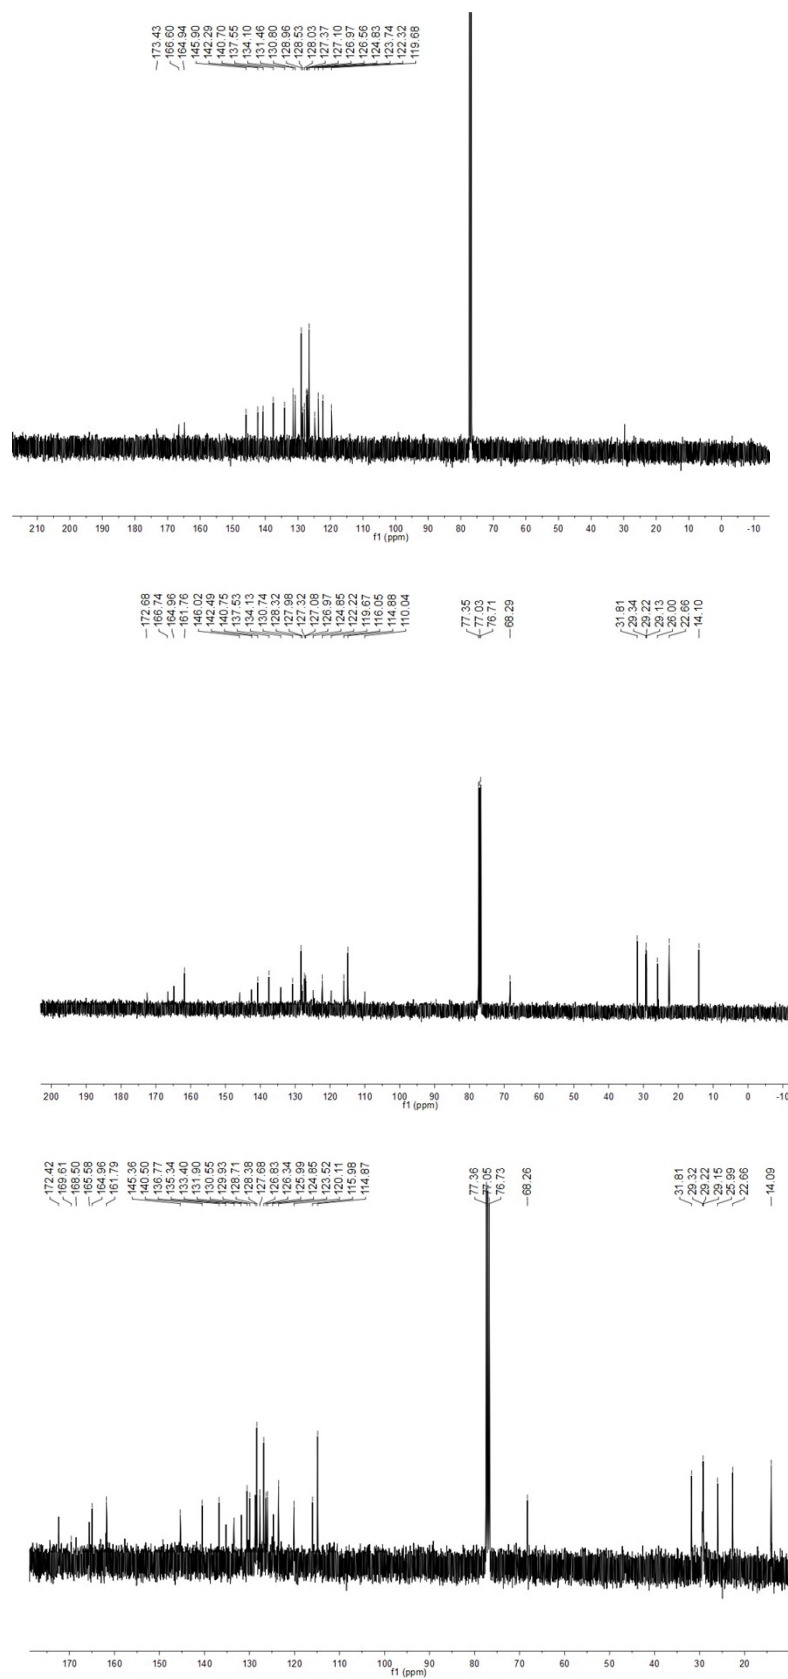

**Figure S10.**  $^{13}\text{C}$  NMR of  $(\text{piq})_2\text{Pt}_2(\mu\text{-PhOXT})_2$  (a),  $(\text{piq})_2\text{Pt}_2(\mu\text{-C}_8\text{PhOXT})_2$  (b) and  $(2\text{niq})_2\text{Pt}_2(\mu\text{-C}_8\text{PhOXT})_2$  (c).

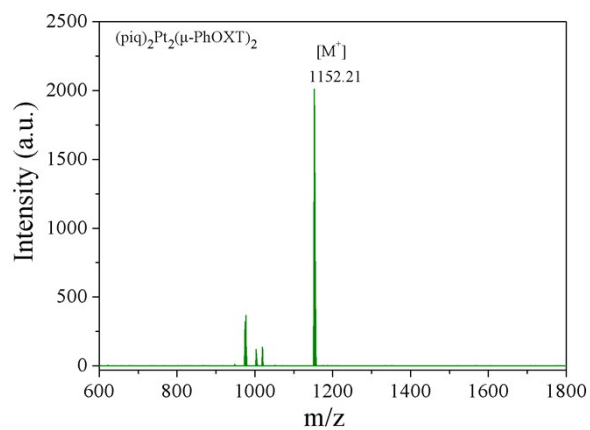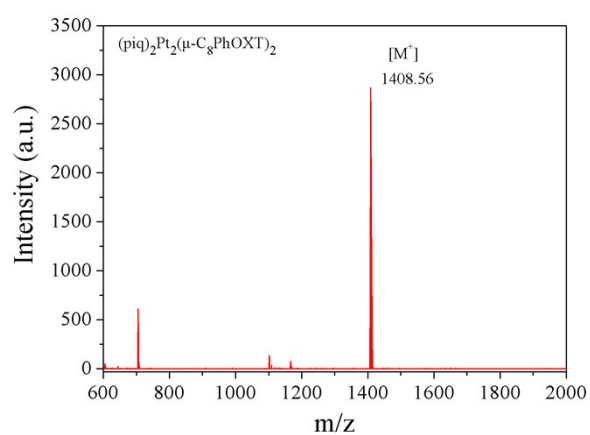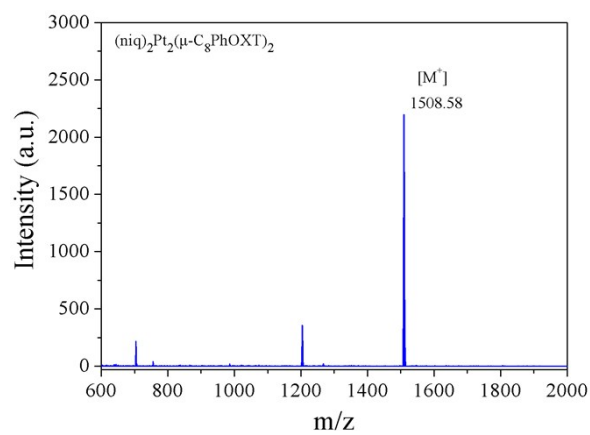

**Figure S11.** MALDI-TOF MS plots of  $(\text{piq})_2\text{Pt}_2(\mu\text{-PhOXT})_2$  (a),  $(\text{piq})_2\text{Pt}_2(\mu\text{-C}_8\text{PhOXT})_2$  (b) and  $(2\text{niq})_2\text{Pt}_2(\mu\text{-C}_8\text{PhOXT})_2$  (c).

**Table S1.** Calculated excitation energy (E), oscillator strength (f), dominant contributing transitions and associated percent contribution and assignment of complexes (piq)<sub>2</sub>Pt<sub>2</sub>(μ-PhOXT)<sub>2</sub>, (piq)<sub>2</sub>Pt<sub>2</sub>(μ-C<sub>8</sub>OXT)<sub>2</sub> and (2niq)<sub>2</sub>Pt<sub>2</sub>(μ-C<sub>8</sub>OXT)<sub>2</sub> (c).<sup>a</sup>

| complex                                                                 | S <sub>n</sub> | E/eV  | E/nm  | f                        | dominant transitions<br>(percent contribution <sup>b</sup> ) | assignment |
|-------------------------------------------------------------------------|----------------|-------|-------|--------------------------|--------------------------------------------------------------|------------|
| (piq) <sub>2</sub> Pt <sub>2</sub> (μ-PhOXT) <sub>2</sub>               | 1              | 2.64  | 469.7 | 0.018                    | HOMO → LOMO (98.8%)                                          | MMLCT      |
|                                                                         | 2              | 2.93  | 423.2 | 0.006                    | HOMO → LOMO+1 (98.2%)                                        | MMLCT      |
|                                                                         | 3              | 2.99  | 414.7 | 0.002                    | HOMO -1 → LOMO (98.4%)                                       | MLLCT      |
|                                                                         | 4              | 3.25  | 381.5 | 0.013                    | HOMO -2 → LOMO (71.9%)                                       | LLCT       |
|                                                                         |                |       |       |                          | HOMO -3 → LOMO (24.3%)                                       |            |
|                                                                         | 5              | 3.28  | 378.0 | 0.007                    | HOMO -1 → LOMO+1 (90.7%)                                     | LLCT       |
|                                                                         | 6              | 3.06  | 405.2 | 0.011                    | HOMO -2 → LOMO (21.4%)                                       | LLCT       |
|                                                                         |                |       |       |                          | HOMO -3 → LOMO (71.7%)                                       |            |
| 7                                                                       | 3.22           | 385.1 | 0.035 | HOMO -4 → LOMO (15.7%)   | ILCT                                                         |            |
|                                                                         |                |       |       | HOMO -2 → LOMO+1 (66.8%) | ILCT                                                         |            |
|                                                                         |                |       |       | HOMO -2 → LOMO+1 (66.8%) | ILCT                                                         |            |
|                                                                         |                |       |       | HOMO -4 → LOMO (15.7%)   | ILCT                                                         |            |
| 8                                                                       | 3.54           | 350.3 | 0.005 | HOMO -3 → LOMO+1 (15.0%) | LLCT                                                         |            |
|                                                                         |                |       |       |                          |                                                              |            |
| (piq) <sub>2</sub> Pt <sub>2</sub> (μ-C <sub>8</sub> OXT) <sub>2</sub>  | 1              | 2.63  | 471.5 | 0.025                    | HOMO → LOMO (98.8%)                                          | MMLCT      |
|                                                                         | 2              | 2.83  | 438.2 | 0.008                    | HOMO → LOMO+1 (97.9%)                                        | MMLCT      |
|                                                                         | 3              | 2.85  | 435.1 | 0.001                    | HOMO -1 → LOMO (98.1%)                                       | MLLCT      |
|                                                                         | 4              | 2.98  | 416.1 | 0.011                    | HOMO -2 → LOMO (89.2%)                                       | LLCT       |
|                                                                         |                |       |       |                          | HOMO -3 → LOMO (6.3%)                                        |            |
|                                                                         | 5              | 3.05  | 406.6 | 0.003                    | HOMO -1 → LOMO+1 (95.7%)                                     | LLCT       |
|                                                                         | 6              | 3.18  | 389.9 | 0.007                    | HOMO -2 → LOMO+1 (85.7%)                                     | LLCT       |
|                                                                         |                |       |       |                          | HOMO -3 → LOMO+1 (6.2%)                                      |            |
|                                                                         | 7              | 3.32  | 373.5 | 0.008                    | HOMO -3 → LOMO (87.0%)                                       | ILCT       |
|                                                                         |                |       |       |                          | HOMO -2 → LOMO (6.8%)                                        | LLCT       |
| HOMO -4 → LOMO (82.7%)                                                  |                |       |       |                          | ILCT                                                         |            |
| 8                                                                       | 3.42           | 362.6 | 0.034 | HOMO -2 → LOMO+1 (7.2%)  | LLCT                                                         |            |
|                                                                         |                |       |       | HOMO -3 → LOMO+1 (4.8%)  | ILCT                                                         |            |
| 9                                                                       | 3.29           | 376.9 | 0.009 | HOMO -4 → LOMO (84.4%)   | ILCT                                                         |            |
|                                                                         |                |       |       | HOMO -3 → LOMO+1 (9.3%)  |                                                              |            |
| 10                                                                      | 3.62           | 342.5 | 0.021 | HOMO -4 → LOMO+1 (82.7%) | ILCT                                                         |            |
| (2niq) <sub>2</sub> Pt <sub>2</sub> (μ-C <sub>8</sub> OXT) <sub>2</sub> | 1              | 2.46  | 504.1 | 0.068                    | HOMO → LOMO (98.5%)                                          | MMLCT      |
|                                                                         | 2              | 2.65  | 467.9 | 0.076                    | HOMO → LOMO+1 (97.7%)                                        | MMLCT      |
|                                                                         | 3              | 2.75  | 450.9 | 0.082                    | HOMO -1 → LOMO (96.8%)                                       | MLLCT      |
|                                                                         |                |       |       |                          | HOMO -2 → LOMO (47.5%)                                       |            |
|                                                                         | 4              | 2.72  | 455.9 | 0.086                    | HOMO -3 → LOMO (42.2%)                                       | LLCT       |
| HOMO -2 → LOMO+1 (3.4%)                                                 |                |       |       |                          |                                                              |            |
| 5                                                                       | 2.77           | 477.7 | 0.089 | HOMO -1 → LOMO+1 (65.7%) | LLCT                                                         |            |
|                                                                         |                |       |       | HOMO -2 → LOMO (17.2%)   |                                                              |            |
|                                                                         |                |       |       | HOMO -3 → LOMO (11.5%)   | LLCT                                                         |            |

|   |      |       |       |                          |      |
|---|------|-------|-------|--------------------------|------|
|   |      |       |       | HOMO -3 → LOMO (35.0%)   | LLCT |
| 6 | 2.67 | 464.4 | 0.090 | HOMO -1 → LOMO+1 (31.2%) | LLCT |
|   |      |       |       | HOMO -2 → LOMO (19.1%)   | LLCT |
|   |      |       |       | HOMO -4 → LOMO (5.1%)    | ILCT |
|   |      |       |       | HOMO -2 → LOMO+1 (40.1%) | LLCT |
| 7 | 2.87 | 432.1 | 0.093 | HOMO -3 → LOMO+1 (27.0%) | LLCT |
|   |      |       |       | HOMO -2 → LOMO (13.1%)   | LLCT |
|   |      |       |       | HOMO -4 → LOMO (12.6%)   | LLCT |
|   |      |       |       | HOMO -2 → LOMO+1 (49.8%) | LLCT |
| 8 | 2.88 | 430.6 | 0.097 | HOMO -3 → LOMO+1 (32.7%) | LLCT |
|   |      |       |       | HOMO -4 → LOMO (9.9%)    | LLCT |
| 9 | 3.01 | 412.0 | 0.098 | HOMO -4 → LOMO (66.0%)   | LLCT |
|   |      |       |       | HOMO -3 → LOMO+1 (29.7%) | LLCT |

<sup>a</sup> Computed at the DFT/B3LYP/def-tzvp. <sup>b</sup> The actual percent contribution = (configuration coefficient)<sup>2</sup> × 2 × 100%.
